# Distinct activities of *Msx1* and *Msx3* in dorsal neural tube development

Ying Liu, Amy W. Helms and Jane E. Johnson\*

Center for Basic Neuroscience, University of Texas Southwestern Medical Center, 5323 Harry Hines Boulevard, Dallas, TX 75390, USA

\*Author for correspondence (e-mail: jane.johnson@utsouthwestern.edu)

Accepted 19 November 2003

Development 131, 1017-1028  
Published by The Company of Biologists 2004  
doi:10.1242/dev.00994

## Summary

**Patterning of the dorsal neural tube involves Bmp signaling, which results in activation of multiple pathways leading to the formation of neural crest, roof plate and dorsal interneuron cell types. We show that constitutive activation of Bmp signaling at early stages (HH10-12) of chick neural tube development induces roof-plate cell fate, accompanied by an increase of programmed cell death and a repression of neuronal differentiation. These activities are mimicked by the overexpression of the homeodomain transcription factor *Msx1*, a factor known to be induced by Bmp signaling. By contrast, the closely related factor, *Msx3*, does not have these activities. At later stages of neural tube development (HH14-16), dorsal progenitor**

**cells lose their competence to generate roof-plate cells in response to Bmp signaling and instead generate dorsal interneurons. This aspect of Bmp signaling is phenocopied by the overexpression of *Msx3* but not *Msx1*. Taken together, these results suggest that these two different *Msx* family members can mediate distinct aspects of Bmp signaling during neural tube development.**

Key words: Spinal cord development, Roof plate, Homeodomain factors, Basic-helix-loop-helix transcription factors, Chick in ovo electroporation, *Math1/Cath1*, *Mash1/Cash1*, Bmp signaling, Dorsal-ventral patterning

## Introduction

During the development of the vertebrate nervous system, multiple signaling pathways play instructive roles in patterning the dorsoventral axis of the neural tube. Sonic hedgehog secreted from the notochord and floor plate induces the differentiation of motoneurons and ventral interneurons in a concentration-dependent manner in the ventral neural tube (reviewed by Briscoe and Ericson, 2001). Similarly, signaling molecules secreted from the epidermal ectoderm and roof plate are involved in patterning the dorsal neural tube. Both Wnt and Bmp signaling pathways have been implicated to be important for dorsal neural tube patterning (Garcia-Castro et al., 2002; Liem et al., 1995; Nguyen et al., 2000). The downstream effectors that mediate these activities of Wnt and Bmp signaling in regulating dorsal neural tube development have been poorly defined. We address the roles of the *Msx* family of transcription factors in mediating downstream effects of Bmp signaling in chick neural tube development.

Three populations of cells develop from the dorsal neural tube/lateral neural plate. Neural crest cells that give rise to the peripheral nervous system are generated from the border region between the neural plate and adjacent ectoderm and migrate out of the neural tube before or during neural tube closure (Le Douarin, 1982). Roof-plate cells develop at the dorsal midline of the neural tube and are a group of specialized glial cells. Both neural crest and roof-plate cells are induced by Bmp signals from the epidermal ectoderm (Liem et al., 1995). The roof-plate cells themselves subsequently become a source of

several Bmps, which can promote the differentiation of a third population of cells, the dorsal spinal cord interneurons (Lee et al., 2000; Lee et al., 1998; Liem et al., 1997). Genetic studies of zebrafish mutants with different components of Bmp signaling pathways disrupted (*swirl/bmp2b*, *snailhouse/bmp7* and *somitabun/smad5*) provide direct evidence for the involvement of Bmps in the specification of neural crest and dorsal neurons (Barth et al., 1999; Nguyen et al., 2000).

It is not clear how Bmp signaling can mediate such a diverse array of activities in the dorsal neural tube. It has been suggested that the competence of neural progenitor cells in the lateral neural plate/dorsal neural tube changes so that early progenitor cells generate neural crest and roof-plate cells in response to Bmp signaling whereas late progenitor cells generate dorsal interneurons, and in vitro explant studies provide evidence consistent with this hypothesis (Liem et al., 1997). Nevertheless, the question remains of what downstream effectors mediate these activities of Bmps, and whether different downstream mediators display a different subset of Bmp initiated activities. One group of candidate effectors for Bmp signaling is the *Msx* family of transcription factors.

*Msx* genes encode homeodomain transcription factors related to the *Drosophila msh* gene (for a review, see Cornell and Ohlen, 2000). These genes have been implicated as downstream targets of the Bmps because members of the *Msx* family are induced in regions where Bmp signaling is active, such as the hindbrain, spinal cord, telencephalon, tooth, facial primordium and limb (Barlow and Francis-West, 1997; Bei and

Maas, 1998; Furuta et al., 1997; Ganan et al., 1996; Graham et al., 1994; Liem et al., 1995; Shimeld et al., 1996; Timmer et al., 2002; Vainio et al., 1993). The mouse *Msx* family has three genes, *Msx1*, *Msx2* and *Msx3* (reviewed by Davidson, 1995). *Msx1* and *Msx2* have largely overlapping expression patterns in a variety of tissues including the roof-plate and adjacent cells in the dorsal neural tube and neural crest (Wang et al., 1996). *Msx3*, however, is expressed exclusively in the dorsal neural tube (Shimeld et al., 1996; Wang et al., 1996).

The functions of *Msx1* and *Msx2* have been studied genetically and biochemically. Targeted inactivation of *Msx1* in mouse reveals a role in the development of the molar tooth and palate (Chen et al., 1996; Satokata and Maas, 1994), and a role in the development of the midline structure in the forebrain (Bach et al., 2003). Inactivation of *Msx2* causes defects in calvarial bones, skin and mammary glands (Satokata et al., 2000). Genetic mutation of *Msx3* in mouse has not been reported. Gain-of-function analysis of *Msx1* function in cell culture and in vivo model systems suggest that *Msx1* acts as a negative regulator of differentiation (Bendall et al., 1999; Hu et al., 2001; Song et al., 1992; Woloshin et al., 1995). This is achieved through its ability to repress the transcription of differentiation genes such as *MyoD* (Bendall et al., 1999) and to regulate the expression and activity of cell cycle molecules such as cyclin D1 and CDK4 (Hu et al., 2001). Biochemical studies show that *Msx1* and *Msx2* are potent transcriptional repressors (Catron et al., 1996; Catron et al., 1995; Newberry et al., 1997; Zhang et al., 1996). Although optimal DNA-binding sites for *Msx* proteins have been identified, in certain contexts, the repressor activity does not require DNA-binding of these factors. Even though less is known about *Msx3*, biochemical studies suggest that it is also a transcriptional repressor (Mehra-Chaudhary et al., 2001).

In the developing mouse spinal cord, all three members of the *Msx* family are expressed in the dorsal neural tube from E9.0 or earlier (Hill et al., 1989; Robert et al., 1989; Shimeld et al., 1996; Wang et al., 1996). As development proceeds, *Msx1* and *Msx2* expression becomes restricted to the dorsal midline roof-plate cells while the expression of *Msx3* is in the ventricular zone of the dorsal one-third of the neural tube but excluded from the roof plate. Loss-of-function studies have not been informative on the role of the *Msx* factors in spinal cord development possibly owing to redundant activity and the overlapping expression of *Msx1*, *Msx2*, and *Msx3* in this tissue.

To begin to address the roles of *Msx* factors in the developing spinal cord, we have analyzed the fate of neural progenitor cells in chick neural tube upon overexpression of the mouse *Msx* genes by in ovo electroporation. For comparison, we also examined the phenotypes of chick embryos with the Bmp signaling pathway activated at different stages by overexpressing the constitutively active forms of Bmp receptors. We show that Bmp signaling and *Msx* factors have stage-dependent activities in determining dorsal cell fates. Activation of Bmp signaling in HH10-12 embryos resulted in an increase of roof-plate cells with a concurrent increase of apoptosis and repression of neuronal differentiation. This set of phenotypes was mimicked by overexpression of *Msx1*, but not *Msx3*. By contrast, when activated Bmp receptors were introduced into later stage neural tubes (HH14-16), dorsal interneuron cell fates were induced rather than roof plate. In

this case, *Msx3* but not *Msx1* induced the same phenotypes. Together, these results demonstrate that *Msx1* and *Msx3* have differential functions in spinal cord development and each may mediate a subset of Bmp activities in patterning the dorsal neural tube.

## Materials and methods

### Plasmid construction

Plasmids expressing mouse *Msx1* and *Msx3* were constructed by subcloning the full-length coding sequences into the chick expression vector pMiWIII (Muramatsu et al., 1997). *Msx1a* contains substitutions in the N-terminal arm of the homeodomain replacing K182, R184 and F187 with Alanines (Zhang et al., 1996). Similarly, *Msx3a* contains Alanine substitutions of K89, R91 and F94 in its homeodomain. The expression plasmids for *Msx1a* and *Msx3a* were constructed by site-directed mutagenesis (Stratagene). Constitutively active forms of the chick Bmp receptors 1a (in pCAGGS) and 1b (in pMiWIII) were kindly provided by J. Timmer (Timmer et al., 2002).

### Chick in ovo electroporation

Fertilized White Leghorn eggs were incubated at 39°C and embryos were staged according to Hamburger and Hamilton (Hamburger and Hamilton, 1992). Stage HH10-12 chick embryos used for electroporation were analyzed after 24 hours (HH15-18) or 48 hours (HH20-22). Stage HH14-16 embryos used for electroporation were analyzed after 24 hours (HH20-22). Plasmid DNA was injected into the lumen of the chick neural tubes at a concentration of 2-3.5 mg/ml (except for ca-Bmpr1b, which was injected at a concentration of 0.3-1.2 mg/ml). A CMV-EGFP expression plasmid (Clontech) was co-injected at a concentration of 2-3 mg/ml for visualization of the electroporated cells. Electric square pulses were applied five times at 25 volts for 50 mseconds with an electro-square porator T830 (BTX, Genetronics). Only embryos with high levels of GFP fluorescence in the neural tube were processed for each experiment. Each embryo was fixed in 4% paraformaldehyde/PBS at 4°C for 1 hour, washed extensively in PBS and cryoprotected in 30% sucrose/PBS at 4°C overnight. Embryos were embedded in OCT and cryosectioned at 20-30µm. Sections were taken in between forelimb and hindlimb levels and only sections with high levels of GFP were used for analysis. All results were repeated in at least four embryos.

### In situ hybridization and immunofluorescence

In situ hybridization was performed as previously described (Birren et al., 1993). Chick *Bmp4*, *Wnt1*, *Cash1*, *Ngn1* and *Ngn2* antisense probes were labeled with digoxigenin and hybridized to frozen sections of the embryos in a concentration of 1-2 µg/ml. *Bmp4* plasmid was obtained from University of Delaware chick EST database (clone pgf2n.pk004.m4). Immunofluorescence was performed as described (Gowan et al., 2001) with the following antibodies: rabbit anti-Math1 (Helms and Johnson, 1998), rabbit anti-Lhx2/9 (L1) (Liem et al., 1995), rabbit anti-Pax2 (Zymed Laboratories), rabbit anti-Dlx (Panganiban et al., 1995), mouse monoclonal antibody Tuj1 (Lee et al., 1990) and monoclonal antibodies obtained from Developmental Studies Hybridoma Bank (DSHB), including anti-*Msx* (4G2) (Liem et al., 1995), anti-Pax7 (Ericson et al., 1996), anti-Lhx1/5 (4F2) (Tsuchida et al., 1994), anti-Is11/2 (39.4D5) (Ericson et al., 1992), anti-Lmx1 (50.5A5) (Riddle et al., 1995) and anti-Mnr2 (81.5C10) (Tanabe et al., 1998). Immunofluorescence images were taken on a BioRad MRC 1024 confocal microscope.

### BrdU labeling and TUNEL assay

BrdU (100-150 µl of 5 mg/ml in PBS) was injected to the vicinity of the heart of the embryo 1 hour before harvesting. Incorporation of BrdU was detected with mouse anti-BrdU (Beckton-Dickinson).

TUNEL assays were performed using the In Situ Cell Death Detection Kit (Roche) according to the manufacturer's instructions.

**Results**

**Msx1, but not Msx3, when overexpressed at early stages of neural tube development, represses neuronal differentiation**

Expression of the Msx family of transcription factors is induced by Bmp signaling in multiple systems, including the neural tube (Furuta et al., 1997; Liem et al., 1995; Timmer et al., 2002) (Fig. 1A',B'). To examine the roles of Msx1 and Msx3 in spinal neural tube development, and to determine if these roles correlate with the function of Bmp signaling, we used electroporation to overexpress *Msx1*, *Msx3* and constitutively active forms of Bmp receptors (*ca-Bmpr1a* and *ca-Bmpr1b*) in chick neural tubes. Electroporation was performed at stage HH10-12 or HH14-16 and embryos were analyzed 24 or 48 hours later as specified in each experiment. Although endogenous Msx expression is restricted to the dorsal half of the neural tube, expression of the constructs occurs along the length of the dorsoventral axis when electroporated into one side of the neural tube (Fig. 1A'-F', compare left and

right sides). In all experiments, the electroporated side is shown on the right and should be compared with the control side on the left.

The most obvious phenotypic change that occurred with overexpression of *ca-Bmpr1a/b*, or *Msx1* into HH10-12 embryos was the decrease in the size of the neural tube on the electroporated side relative to the control side when we analyzed the embryos 48 hours post electroporation (Fig. 1A-C). This phenotype is illustrated here using a marker for neuronal differentiation Tuj1 (Fig. 1). The decrease in size of the neural tube reflects a subtle decrease in the size of the ventricular zone (see Fig. 3F-J), and a more dramatic reduction in the size of the mantle layer where differentiating Tuj1-expressing neurons reside. The decrease in size of the neural tube was specific to Msx1, as the related Msx3 did not have this phenotype (Fig. 1E). *Msx1a*, a previously described mutant form of Msx1, contains three amino acid substitutions in the N-terminal arm of the homeodomain and cannot bind DNA (Bendall et al., 1999; Hu et al., 2001; Zhang et al., 1996; Zhang et al., 1997). Ectopic expression of *Msx1a* did not cause a small neural tube phenotype or a decrease of neuronal differentiation (Fig. 1D), suggesting that the N-terminal arm of the Msx1 homeodomain is critical for its activity. A similar

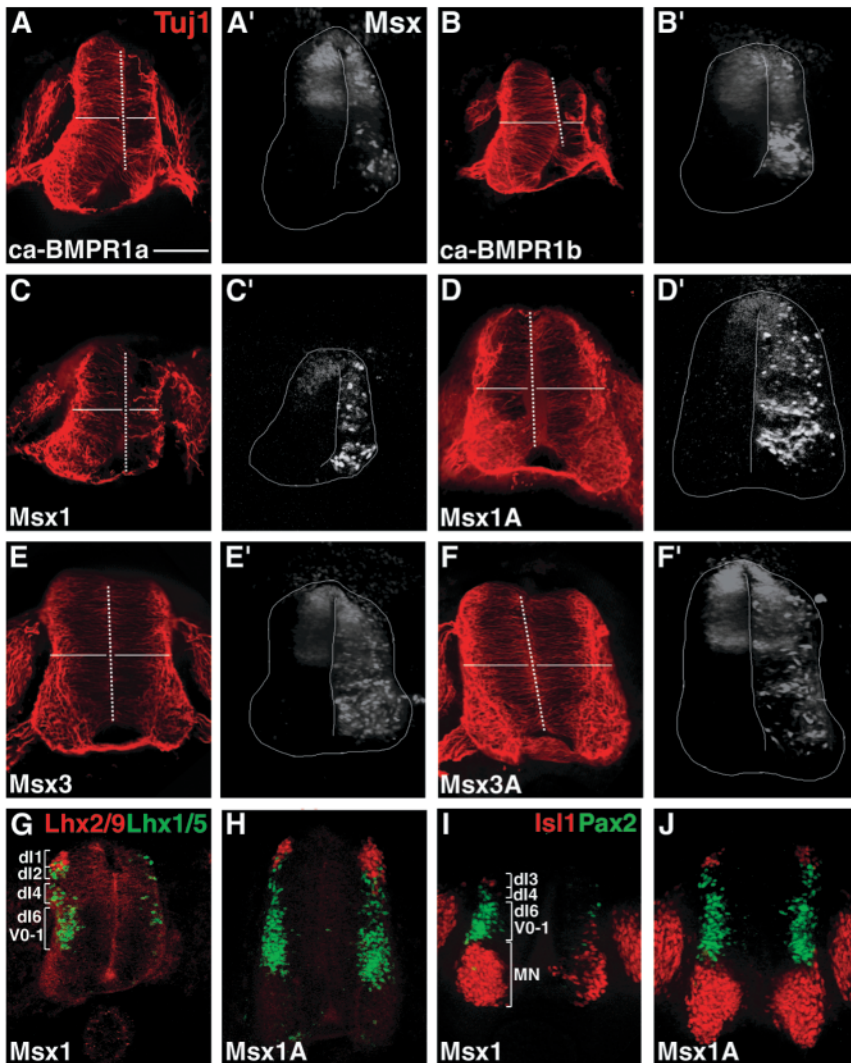

**Fig. 1.** Early expression of Bmp receptors and Msx1 but not Msx3 repress neuronal differentiation. (A-F) Immunofluorescence labeling with the antibody Tuj1 in embryos electroporated at HH10-12 and assayed 48 hours post electroporation at HH20-22. Electroporated constructs are indicated. Broken lines indicate the midline of the neural tube. Horizontal lines indicate the width of the control (left) versus the electroporated (right) side of the neural tube. (A'-F') Immunofluorescence labeling with the Msx antibody showing the endogenous Msx expression on the control side and the ectopic expression of Msx on the electroporated side by Bmp signaling induction (A' and B') or overexpression of *Msx* constructs (C'-F'). (G-J) Immunofluorescence labeling of neuronal differentiation markers Lhx2/9 (red) and Lhx1/5 (green) (G,H), and Isl1 (red) and Pax2 (green) (I,J) in neural tubes electroporated with *Msx1* or *Msx1a*. (K) Schematic showing the dorsoventral boundaries of the ventricular zone markers Msx, Cath1, chick Ngn1, Cash1, and the differentiation markers Lhx2/9, Lhx1/5, Brn3a, Isl1, Pax2 and Lmx1b. dl1-6, dorsal interneuron populations 1-6; MN, motor neuron; V0-1, ventral interneuron populations 0 and 1. In all panels left is the control side and right is the electroporated side. Scale bar: 150  $\mu$ m.

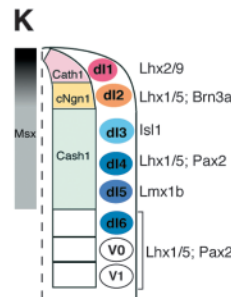

mutant for *Msx3*, *Msx3a*, did not change the differentiation status or size of the neural tube (Fig. 1F). Thus, Bmp signaling and *Msx1* overexpression result in a smaller neural tube with a specific reduction in neuronal differentiation.

To determine if the repression of neuronal differentiation was general or restricted to defined neuronal populations, expression of the LIM-homeodomain proteins *Lhx2/9*, *Lhx1/5* and *Isl1*, as well as Paired-homeodomain protein *Pax2*, was examined. These transcription factors mark different populations of dorsal and ventral interneurons as well as motoneurons in the developing spinal cord (Fig. 1K). Currently, six different dorsal interneuron populations (dI1-dI6) and four ventral interneuron populations (V0-V3) have been identified based on the expression of different markers (for reviews, see Briscoe and Ericson, 2001; Helms and Johnson, 2003). As illustrated in Fig. 1K, *Lhx2/9* marks the dI1 population; *Lhx1/5* marks the dI2, 4 and 6, as well as V0 and V1 populations; *Isl1* marks the dI3 and the motoneuron populations; and *Pax2* marks the dI4, dI6, V0 and V1 neuronal populations. Expression of all these differentiation markers was repressed by *Msx1* (Fig. 1G,I), resulting in a significant reduction of cells expressing these markers on the electroporated side in comparison with the control side of the neural tube (Table 1). Overexpression of the mutant *Msx1a*, however, caused a subtle increase in each neuronal population, suggesting it may be acting as a dominant negative (Fig. 1H,J, Table 1). Repression of all differentiation markers was also observed in embryos overexpressing *ca-Bmpr1a/b* at stage HH10-12 (Table 1). Therefore, at early stages of neural tube formation, overexpression of *Msx1* and Bmp signaling inhibit differentiation of neurons throughout the dorsoventral axis of the neural tube.

### Repression of neuronal differentiation gene expression by *Msx1*

*Msx1* is a potent transcriptional repressor; therefore, the repression of neuronal differentiation by *Msx1* could be achieved through its ability to repress the transcription of neuronal differentiation genes. We examined the expression of early differentiation genes expressed in the ventricular zone in *Msx1*-electroporated neural tube. The basic helix-loop-helix (bHLH) transcription factors *Math1*, *Mash1*, *neurogenin1* and *neurogenin2* (*Ngn1/2*) are involved in neurogenesis and specification of dorsoventral neuronal cell types in the

developing spinal cord (Gowan et al., 2001). Overexpression of *Msx1* but not the mutant *Msx1a* resulted in loss or dramatic reduction in expression of each of these regulatory genes (Fig. 2). *Cath1* (chick ortholog of *Math1*) expression was dramatically repressed by *Msx1* (Fig. 2A). Significant repression was also observed for the chick orthologs of *Mash1* (*Cash*), *Ngn1* and *Ngn2* (Fig. 2C,E,G), although in these cases, expression was not completely lost but was rather decreased with a disruption in the pattern. An additional marker of progenitor cells in the dorsal neural tube was examined. *Pax7*, a paired homeodomain factor, is expressed in the dorsal half of the neural tube (Mansouri and Gruss, 1998), and its expression was also dramatically downregulated by *Msx1* (Fig. 2I). Overexpression of the mutant *Msx1a* did not repress expression of the differentiation genes (Fig. 2B,D,F,H,J). Expression of *Msx1a* was confirmed by immunostaining with the *Msx* antibody (data not shown). Thus, the repression activity of *Msx1* depends on an intact N-terminal arm of its homeodomain. Taken together, *Msx1* inhibits neuronal differentiation at least in part through repression of regulatory genes such as the bHLH and paired homeodomain transcription factors.

### *Msx1*, but not *Msx3*, when overexpressed at early stages of neural tube development, induces apoptosis

In addition to the decrease in neuronal differentiation, we also examined whether the small neural tube size could be due to an increase in apoptosis and/or a decrease in proliferation. A clear increase in the number of apoptotic cells was observed in embryos overexpressing *ca-Bmpr1* or *Msx1*, as revealed by TUNEL labeling (Fig. 3A-E). There was a two- to fourfold increase in TUNEL<sup>+</sup> cells on the electroporated side compared to the control side in *ca-Bmpr1*- and *Msx1*-expressing embryos 24 hours post electroporation (Fig. 3A,B,E), and a three- to fivefold increase 48 hours post electroporation (Fig. 3C,D,E). These data suggest that increased apoptosis is one factor contributing to the smaller neural tube phenotype observed in *ca-Bmpr1*- and *Msx1*-electroporated embryos.

We measured neural progenitor cell proliferation by examining incorporation of the thymidine analog BrdU. In contrast to the dramatic reduction of the overall size of the neural tube, the size of the ventricular zone of *ca-Bmpr1*- or *Msx1*-expressing neural tube was only slightly reduced (Fig.

**Table 1. Comparison of number of cells expressing various differentiation markers in electroporated embryos**

|                         | <i>Lhx2/9</i>             | <i>Lhx1/5</i>               | <i>Isl1</i> (total)       | <i>Isl1</i> (dI3)          | <i>Isl1</i> (MN)               | <i>Mnr2</i>                 | <i>Pax2</i>                  |
|-------------------------|---------------------------|-----------------------------|---------------------------|----------------------------|--------------------------------|-----------------------------|------------------------------|
| <i>Msx1</i>             | 10.0±1.13<br>1.2±0.53***  | 38.4±2.71<br>10.5±1.69***   | 92.3±8.82<br>46.6±8.48*** |                            |                                | ND<br>ND                    | 36.4±2.03<br>6.9±1.20***     |
| <i>Msx1a</i>            | 15.1±0.55<br>25.3±1.98*** | 58.0±6.81<br>76.3±6.48 (ns) |                           | 8.2±2.94<br>13.0±1.30 (ns) | 120.0±12.49<br>128.2±6.88 (ns) | ND<br>ND                    | 35.8±11.04<br>53.4±6.05 (ns) |
| <i>ca-Bmpr1</i> (early) | 10.7±1.11<br>1.6±0.69***  | 57.4±1.49<br>35.7±4.26***   | 95.0±4.03<br>46.6±8.48*** |                            |                                | ND<br>ND                    | 38.5±2.99<br>9.3±1.05***     |
| <i>Msx3</i>             | 10.1±1.39<br>25.7±3.15*** | 39.4±3.38<br>23.6±2.48**    |                           | 12.6±0.98<br>22.5±1.36***  | 120.1±3.25<br>104.5±5.45*      | 80.0±0.20<br>72.8±3.66 (ns) | 59.1±2.06<br>38.7±3.06***    |
| <i>Msx3a</i>            | 18.5±1.23<br>13.7±1.43*   | 79.8±4.29<br>50.8±3.24***   |                           | 12.0±0.89<br>9.0±1.38 (ns) | 117.1±3.33<br>99.1±2.45**      | 87.5±4.55<br>86.5±3.43 (ns) | 53.3±2.69<br>43.1±5.62 (ns)  |
| <i>ca-Bmpr1</i> (late)  | 10.0±1.73<br>18.2±2.64*   | 60.3±1.03<br>57.8±2.75 (ns) |                           | 7.1±0.74<br>15.8±1.26***   | 95.5±3.69<br>85.1±3.50 (ns)    | 97.7±3.09<br>97.1±3.29 (ns) | 47.9±4.07<br>37.6±4.89 (ns)  |

Results are mean±s.e.m. ( $n>10$ ; \*\*\*  $P<0.001$ ; \*\*  $P<0.005$ ; \*  $P<0.05$ ).

ND, not determined; ns, not significant.

For each set of data, top is the number of cells on the control side, and bottom is the number of cells on the electroporated side.

3F-J). We observed a 20-30% reduction of mitotic cells on the electroporated side compared with the control side both 24 hours and 48 hours post electroporation (Fig. 3J). However,

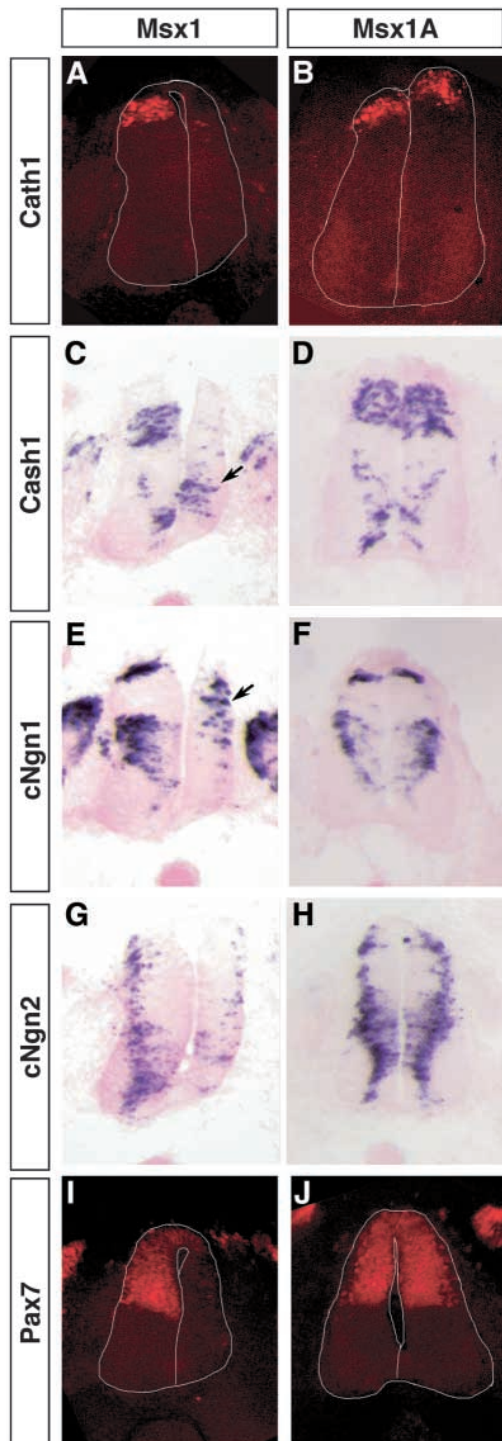

**Fig. 2.** Msx1 represses the expression of neural progenitor genes. Neural progenitor markers Cath1 (A,B) and Pax7 (I,J), which are detected by immunofluorescence labeling; as well as *Cash1* (C,D), chick *Ngn1* (E,F), chick *Ngn2* (G,H), which are detected by in situ hybridization, are repressed by Msx1 (A,C,E,G,I) but not Msx1a (B,D,F,H,J). Arrows in C and E indicate the disruption of dorsoventral patterns of *Cash1* and chick *Ngn1* expression. In all panels, left is the control side and right is the electroporated side.

most of the reduction can be accounted for by the increase of apoptosis in the neural tube, therefore it is not likely that ca-Bmpr1 or Msx1 has a direct effect on proliferation in this assay.

Altogether, these results demonstrate that increased cell death and decreased neuronal differentiation contribute to the small neural tube phenotype caused by *ca-Bmpr1* or *Msx1* overexpression. The fact that expression of *ca-Bmpr1a/b* cause ectopic Msx expression (Fig. 1A',B') suggests that Msx1 is an effector in the Bmp signaling pathway for these specific phenotypes in the developing neural tube.

**Overexpression of *Msx1* but not *Msx3* promotes roof-plate cell fate in a stage-dependent manner**

Bmp signaling is involved in the generation of dorsal cell types including neural crest and roof plate, and dorsal interneurons (reviewed by Helms and Johnson, 2003; Lee and Jessell, 1999). To determine whether Msx1, Msx3, or both, are involved in the generation of any of these cell types, we examined markers for each of these cell types in the electroporated neural tubes. Expression of the *ca-Bmpr1* constructs resulted in an increase in the number of cells migrating from the dorsal aspect of the neural tube expressing *Dlx*, a marker for neural crest (Fig. 4A,D). The *ca-Bmpr1* constructs also induced the expression of the neural crest marker *Slug* on the electroporated side of the neural tube (Fig. 4E), consistent with the ability of Bmps to induce *Slug* expression in chick neural plate explant culture (Liem et al., 1995). Electroporation of both mouse *Msx1* and *Msx3* resulted in an increase in the number of *Dlx*-expressing cells migrating from the neural tube (Fig. 4B-D). However, in contrast to the activity of *ca-Bmpr1*, there was no induction of *Slug* in the neural tube of *Msx1*- or *Msx3*-expressing embryos (Fig. 4F,G). Thus, Msx1 and Msx3 can phenocopy some aspects of activating Bmp signaling, but they cannot fully mimic these activities in induction of neural crest in this assay.

To determine whether the mouse Msx genes could influence roof-plate differentiation in chick neural tube, we examined three roof-plate markers: *Bmp4* (Liem et al., 1995), *Wnt1* (Parr et al., 1993) and *Lmx1* (Millonig et al., 2000; Yuan and Schoenwolf, 1999) in electroporated embryos. Activation of Bmp signaling by *ca-Bmpr1* induced the expression of *Bmp4*, *Wnt1* and *Lmx1* in the dorsal neural tube after 24 hours (Fig. 5A,F,K,P). The *Lmx1* family members (*Lmx1a* and *Lmx1b*) are expressed in the roof plate, floor plate and d15 population of dorsal interneurons (Gross et al., 2002; Millonig et al., 2000; Muller et al., 2002; Pierani et al., 2001). At 24 hours post electroporation, the induction of *Lmx1* expression most probably reflects an induction of roof-plate cell fate because differentiation of dorsal interneurons has not occurred at this stage (Fig. 5K, see control side). Overexpression of *Msx1*, but not *Msx3*, also induced all three roof-plate markers after 24 hours, resulting in a ventral expansion of the roof-plate marker expression (Fig. 5, compare B,G,L with C,H,M). However, Bmp signaling is more potent in its ability to induce roof-plate development than Msx1, with more cells ectopically expressing the roof-plate markers and the ectopic expression extended more ventrally, even though the electroporation efficiency in all experiments is comparable, as indicated by the control GFP expression (Fig. 5A-E, insets).

A dramatic induction of *Bmp4*, *Wnt1* and *Lmx1* was seen in *ca-Bmpr1*-electroporated embryos 48 hours after

electroporation (Fig. 5D,I,N,P). By contrast, little or no induction of the roof-plate markers was detected in *Msx1*-expressing embryos at this stage (Fig. 5E,J,O,P), suggesting that *Msx1* is sufficient to initiate the expression of roof-plate markers but not sufficient to maintain their expression. Induction of these three markers was not observed in embryos

overexpressing *Msx3* 48 hours post electroporation (data not shown). Taken together, these results indicate that *Msx1*, but not *Msx3*, can mediate a subset of Bmp activities to induce roof-plate development. We found that both Bmp signaling and *Msx1* are capable of inducing roof-plate markers only when they are overexpressed at stage HH10-12, but not at HH14-16

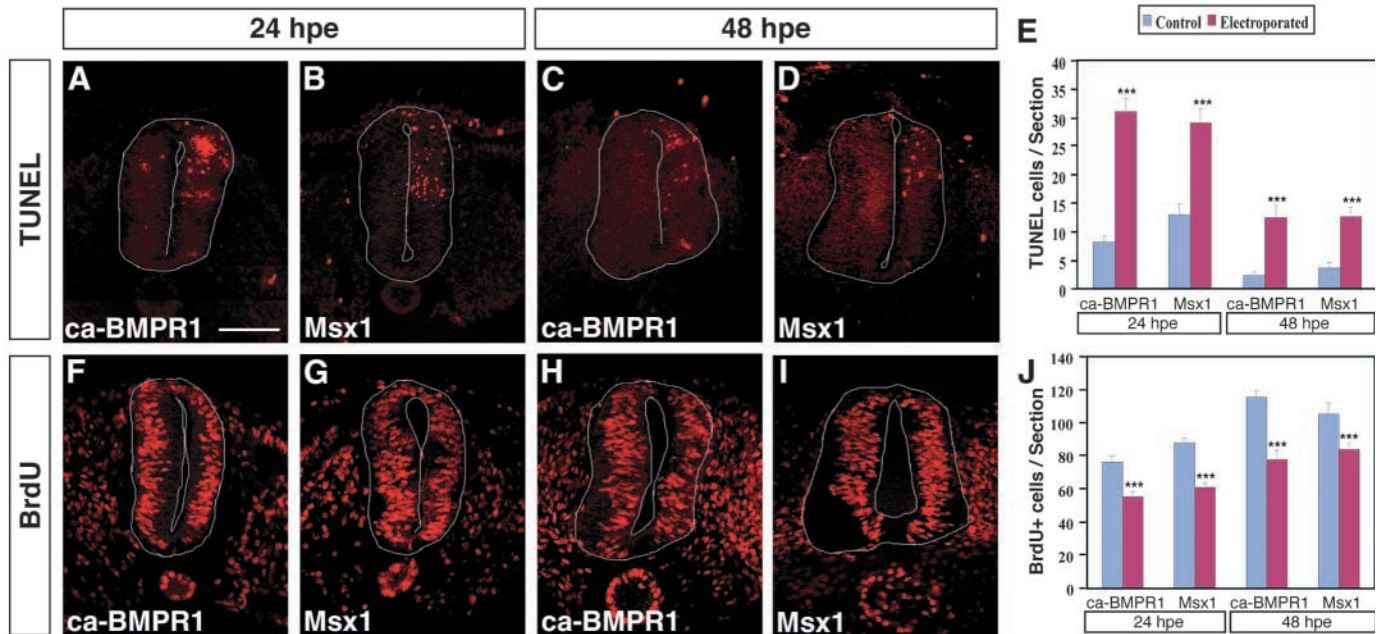

**Fig. 3.** Early expression of Bmp receptors and *Msx1* induce apoptosis and decrease proliferation. TUNEL labeling (A-D) and BrdU incorporation (F-I) in embryos electroporated at HH10-12 with *ca-Bmpr1a/b* or *Msx1* as indicated and viewed at 24 (A,B,F,G) or 48 (C,D,H,I) hpe. (E,J) Graphs showing number of TUNEL<sup>+</sup> (E) or BrdU<sup>+</sup> (J) cells/section (mean±s.e.m.,  $n=16$  sections from at least four embryos; \*\*\* $P<0.001$ ). hpe, hour post-electroporation. In all panels, left is the control side and right is the electroporated side. Scale bar: 150  $\mu$ m.

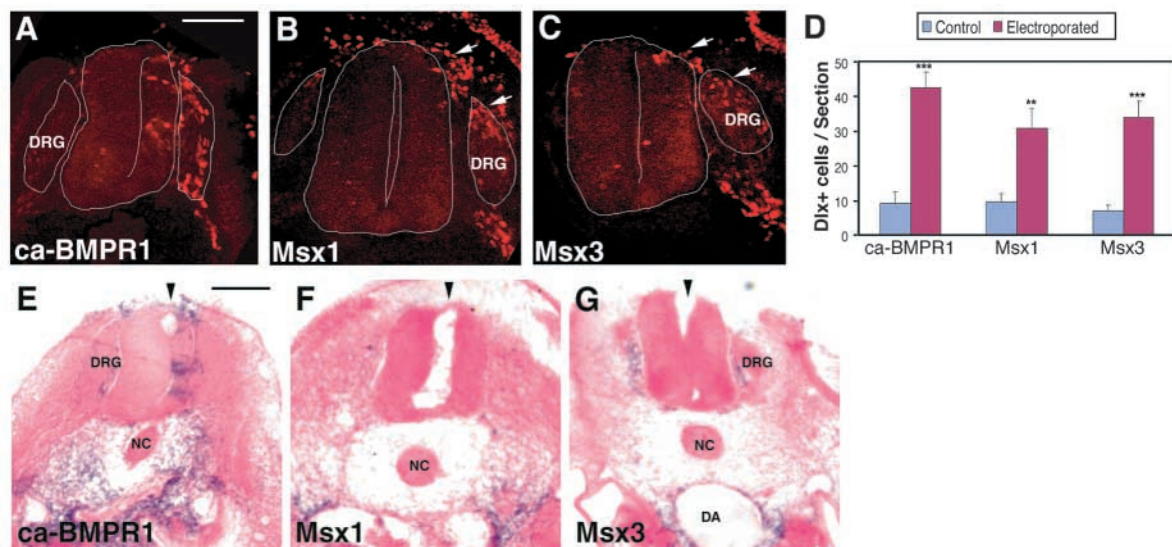

**Fig. 4.** Neural crest marker *Dlx* is induced by Bmp signaling, *Msx1* and *Msx3*. Immunofluorescence labeling showing an increase in number of migrating *Dlx*<sup>+</sup> cells induced by overexpression of *ca-Bmpr1* (A), *Msx1* (B) and *Msx3* (C). Arrows indicate migrating *Dlx*<sup>+</sup> cells. *ca-Bmpr1* also induces ectopic *Dlx* expression within the neural tube (A). (D) Quantification of *Dlx*<sup>+</sup> cells/section on the control side and the electroporated side of the neural tubes shown in A-C. Data shown as mean±s.e.m.,  $n=16$  sections from at least four embryos; \*\*\* $P<0.001$ ; \*\* $P<0.005$ . (E-G) The expression of another neural crest marker, *Slug*, detected by in situ hybridization, is induced within the neural tube by *ca-Bmpr1* (E), but not *Msx1* (F) or *Msx3* (G). DA, dorsal aorta; DRG, dorsal root ganglia; NC, notochord. In all panels, left is the control side and right is the electroporated side. Scale bars: 150  $\mu$ m.

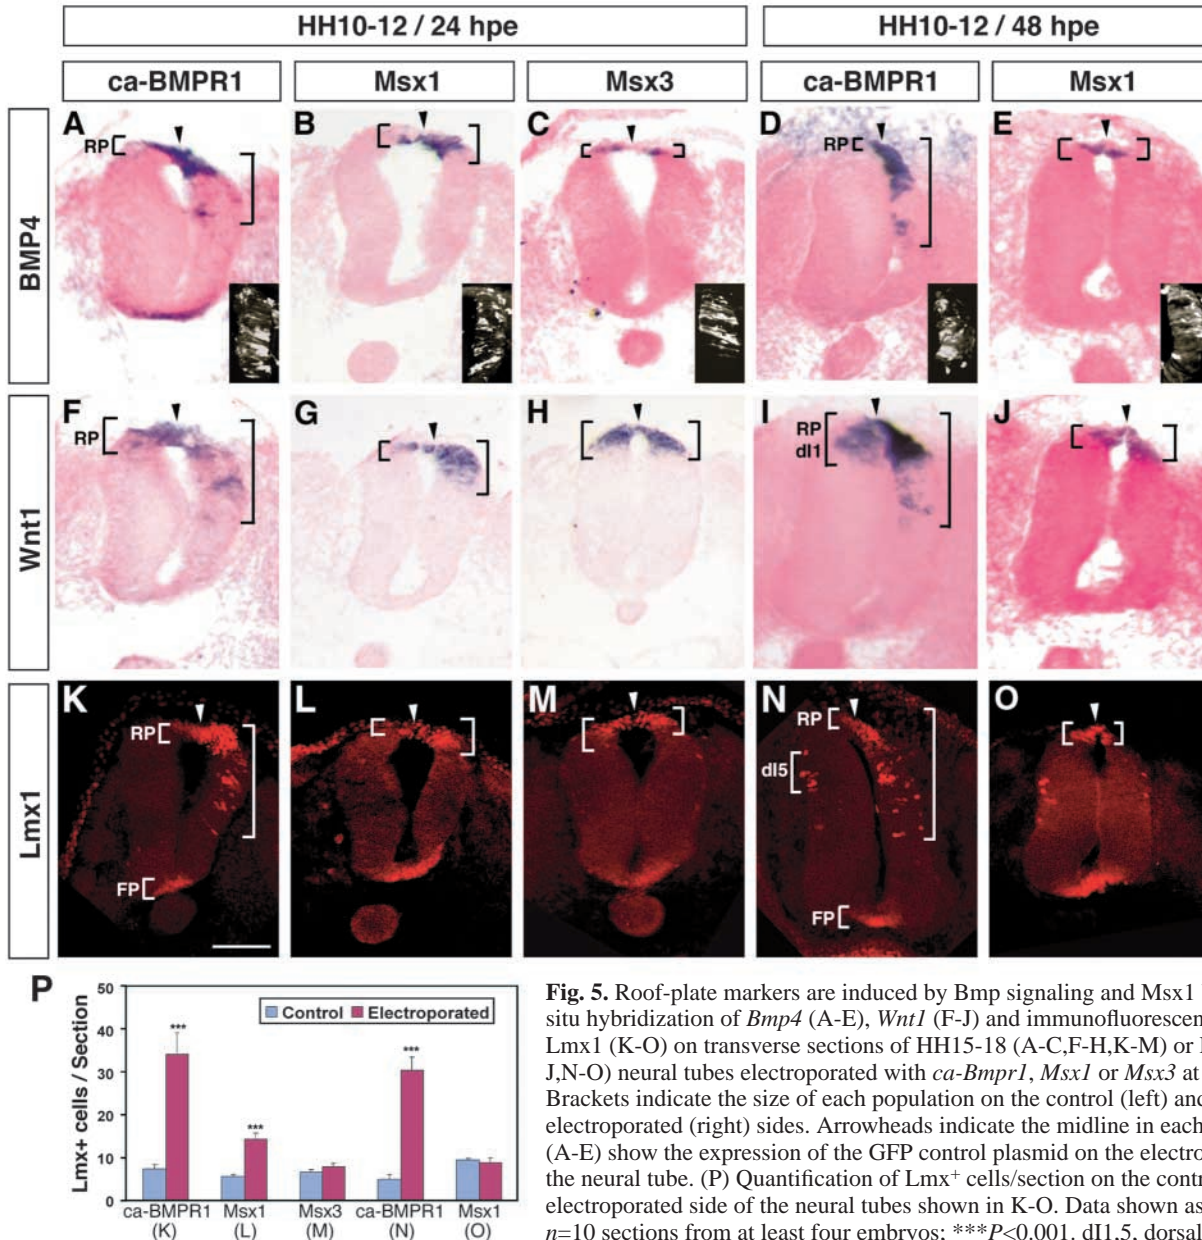

**Fig. 5.** Roof-plate markers are induced by Bmp signaling and Msx1 but not Msx3. In situ hybridization of *Bmp4* (A-E), *Wnt1* (F-J) and immunofluorescence labeling of Lmx1 (K-O) on transverse sections of HH15-18 (A-C,F-H,K-M) or HH20-22 (D-E,I-J,N-O) neural tubes electroporated with *ca-Bmpr1*, *Msx1* or *Msx3* at stages indicated. Brackets indicate the size of each population on the control (left) and the electroporated (right) sides. Arrowheads indicate the midline in each panel. Insets in (A-E) show the expression of the GFP control plasmid on the electroporated side of the neural tube. (P) Quantification of Lmx<sup>+</sup> cells/section on the control side and the electroporated side of the neural tubes shown in K-O. Data shown as mean±s.e.m., n=10 sections from at least four embryos; \*\*\*P<0.001. dl1,5, dorsal interneuron populations 1 or 5; FP, floor plate; hpe, hour post-electroporation; RP, roof plate. In all panels left is the control side and right is the electroporated side. Scale bar: 150 μm.

(data not shown), suggesting a switch in the competence of progenitor cells in the neural tube between these stages.

**Msx3 and late activation of Bmp signaling induce dorsal interneuron cell fates**

Activation of Bmp signaling in late chick embryos (HH14-16) induces neural progenitor cells to adopt a dorsal neuronal cell fate marked by Math1/Cath1 (Lee et al., 1998; Timmer et al., 2002). Therefore, we examined Cath1 expression when Msx1 and Msx3 were overexpressed at this later stage. No significant change in the number of Cath1<sup>+</sup> cells between the control and electroporated sides was detected when Msx1 was electroporated into HH14-16 embryos and analyzed 24 hours later at HH20-22 (data not shown). By contrast, a twofold increase of Cath1<sup>+</sup> cells was detected in embryos

overexpressing Msx3 at HH14-16 (Fig. 6D,E,G). In fact, a small increase of Cath1<sup>+</sup> cells was also detected when Msx3 was electroporated into HH10-12 embryos and analyzed 48 hours later (Fig. 6A,B,G). Using double label immunofluorescence we found many Cath1 and Msx double positive cells (Fig. 6B,E, arrows), suggesting a cell-autonomous mechanism. These results indicate that even though Msx3 exhibits similar DNA-binding and transcriptional repression activity in vitro as Msx1 (Mehra-Chaudhary et al., 2001), the two proteins have very different in vivo activities in terms of regulating *Cath1* expression. Induction of *Cath1* expression is dependent on the N-terminal arm of Msx3 homeodomain because Msx3a did not significantly increase the number of Cath1<sup>+</sup> cells (Fig. 6C,F,G).

Consistent with the increase of Cath1-expressing dorsal

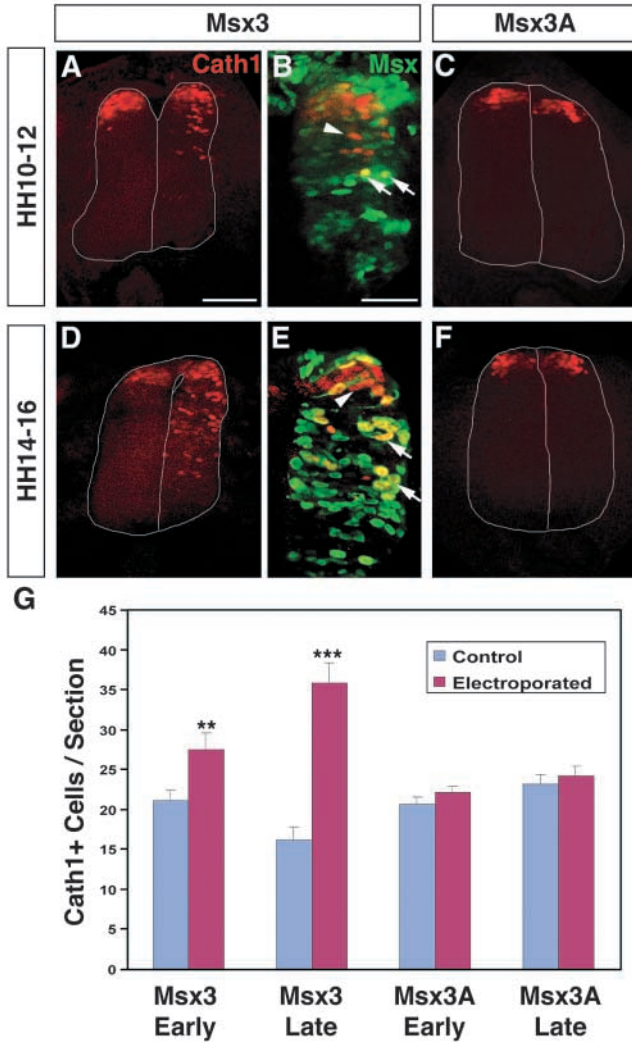

**Fig. 6.** *Msx3* induces neural progenitor cells to adopt a dorsal cell fate. (A-F) Immunofluorescence labeling of *Cath1* in HH20-22 neural tubes. Electroporation of *Msx3* in HH10-12 (A,B) or HH14-16 (D,E) embryos induces ventral ectopic expression of *Cath1* at HH20-22. (B,E) Higher magnification images of the electroporated (right) side of the neural tubes in A and D showing *Cath1* (red) and *Msx* (green) double positive cells (yellow, arrows) and *Cath1*<sup>+</sup>*Msx*<sup>-</sup> cells (red, arrowheads). Overexpression of *Msx3A* does not induce ectopic *Cath1* expression (C,F). (G) Bar graph indicating number of *Cath1*<sup>+</sup> cells/section in *Msx3*- versus *Msx3A*-electroporated embryos (late indicates electroporation at HH14-16; early indicates electroporation at HH10-12) (mean ± s.e.m.,  $n=16$  sections from at least four embryos; \*\*\* $P < 0.001$ , \*\* $P < 0.005$ ). In all panels, left is the control side and right is the electroporated side. Scale bars: 150  $\mu\text{m}$  in A,C,D,F; 75  $\mu\text{m}$  in B,E.

progenitor cells in *Msx3*-electroporated neural tube, the interneurons derived from these progenitors, dI1 neurons marked by *Lhx2/9*, were also expanded ventrally (Fig. 7A,B). The expansion of *Lhx2/9* interneurons was at the expense of cells that have more ventral cell fates, illustrated by the reduction in the marker *Lhx1/5* that marks dI2, dI4, dI6 and V0-V1 populations (Fig. 7A,B, Table 1). The ventral expansion of *Lhx2/9* in these embryos is similar to that seen with activation of Bmp signaling at late stages (Fig. 7D) (Timmer

et al., 2002). Ectopic expression of another differentiation marker *Isl1* was also observed in both *Msx3*- and *ca-Bmpr1*-electroporated embryos (Fig. 7E,F,H, Table 1). Because *Isl1* marks both the dI3 interneuron and the motoneuron populations, ectopic expression of *Isl1* could be the result of a ventral expansion of dI3 neurons or a dorsal expansion of motoneurons. To distinguish between these two possibilities, we examined the expression of motoneuron marker *Mnr2* (Tanabe et al., 1998). Staining of *Mnr2* showed that although the shape of the motoneuron pool seemed to be elongated in *Msx3*-overexpressing neural tubes (Fig. 7I,J), no ectopic *Mnr2*<sup>+</sup> cells were detected outside of the MN domain and there was not a significant increase of the number of *Mnr2*<sup>+</sup> cells on the electroporated side (Table 1). This suggests that the ectopic expression of *Isl1* reflects the ventral expansion of the dI3 interneurons. This expansion was accompanied by a reduction of the more ventral *Pax2*<sup>+</sup> neuronal populations (Fig. 7E,F,H,I, Table 1). Electroporation of the mutant *Msx3a* did not cause the ventral expansion of dI1 or dI3 interneurons (Fig. 7C,G,K, Table 1).

Taken together, these results indicate that *Msx3* and late activation of Bmp signaling promote the formation of dorsal interneurons at the expense of ventral neurons. The induction of dorsal interneuron cell fate is an activity specific to *Msx3* because we did not see expansion of dorsal neuron populations in *Msx1*-expressing embryos electroporated at early or late stages (Fig. 1H,J, data not shown).

## Discussion

### *Msx* family members mediate stage-dependent activities of Bmps in patterning the dorsal neural tube

The instructive roles that Bmp signaling plays in patterning the dorsal neural tube are well established (for reviews, see Helms and Johnson, 2003; Lee and Jessell, 1999). Loss-of-function studies in mouse and zebrafish in combination with gain-of-function studies in mouse and chick have provided evidence for the involvement of Bmps in specifying dorsal cell fates (Barth et al., 1999; Hebert et al., 2002; Lee et al., 2000; Liem et al., 1997; Liem et al., 1995; Nguyen et al., 2000; Panchision et al., 2001; Timmer et al., 2002). Furthermore, a temporal switch in the competence of neural progenitor cells to respond to Bmp signaling has been demonstrated (Liem et al., 1997). For example, stage HH10 chick neural plate explant generated neural crest cells when cultured with Bmp4 for 24 hours. By contrast, explants from HH15 embryos failed to generate neural crest cells, but rather generated dI1 and dI3 dorsal interneurons in response to 24 hours of Bmp treatment. Such a change in the competence of the neural progenitor cells ensures that the proper cell types in proper numbers are produced in the developing spinal cord.

The chick in ovo electroporation system provides a unique advantage to study stage-dependent activities of signaling pathways and transcription factors. Consistent with the explant studies, our results provide in vivo evidence for a temporal switch in the competence of neural progenitor cells in response to Bmp signaling. Overexpression of *ca-Bmpr-1a* and *ca-Bmpr-1b* in chick neural tube before or during neural tube closure (HH10-12) increased the number of cells expressing neural crest and roof-plate markers, while repressing neuronal



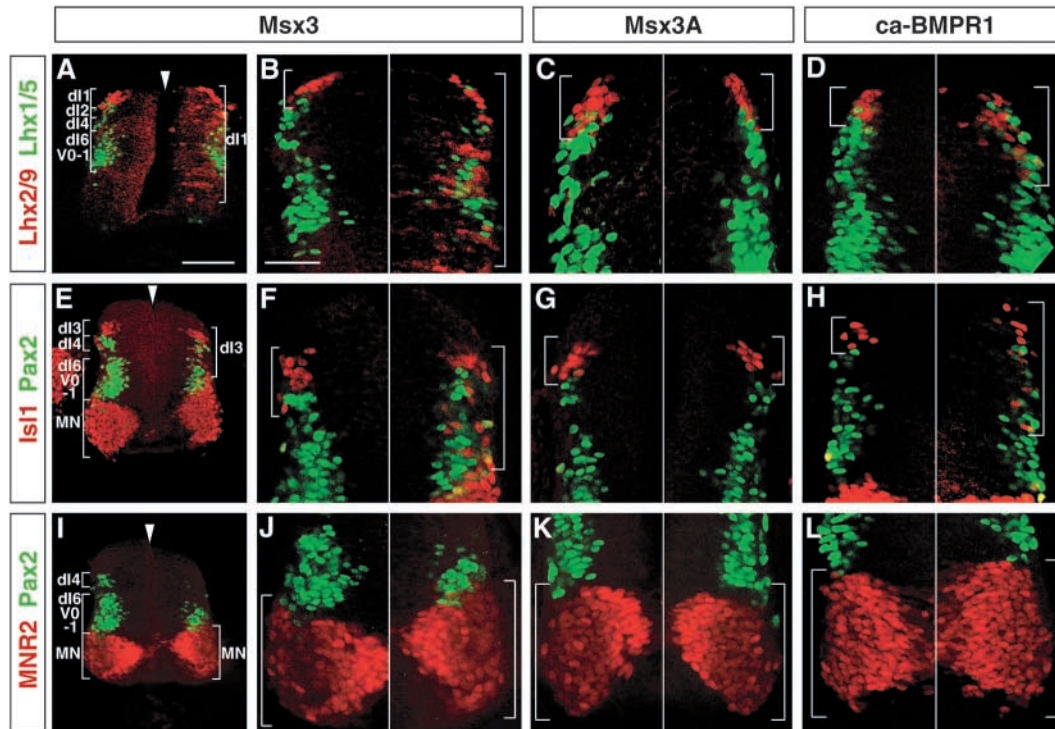

**Fig. 7.** *Msx3* and late activation of Bmp signaling induce dorsal interneuron cell fates at the expense of ventral cell fates. (A–D) Lhx2/9 (red) and Lhx1/5 (green) immunofluorescence labeling shows a ventral expansion of Lhx2/9<sup>+</sup> dI1 population in embryos overexpressing *Msx3* (A,B), *ca-Bmpr1a/b* (D) but not *Msx3a* (C). (E–H) Isl1 (red) and Pax2 (green) labeling shows a ventral expansion of Isl1<sup>+</sup> dI3 population in embryos electroporated with *Msx3* (E,F), *ca-Bmpr1a/b* (H) but not *Msx3a* (G). (I–L) Mnr2 (red) and Pax2 (green) labeling shows no significant dorsal expansion of Mnr2<sup>+</sup> motoneurons. dI1–6, dorsal interneuron populations 1–6; MN, motoneuron; V0–1, ventral interneuron populations 0 and 1. Brackets outline the size of each neuronal population indicated. Arrowheads in A,E,I indicate the dorsal midline. In all panels, left is the control side and right is the electroporated side. Scale bars: 150  $\mu$ m in A,E,I; 75  $\mu$ m in B–D,F–H,J–L.

differentiation and inducing apoptosis. By contrast, activation of Bmp signaling after neural tube closure (HH14–16) promoted the dorsal progenitor cells to adopt dI1 and dI3 interneuron cell fates rather than neural crest or roof-plate cell fate.

In this study, we found that mouse *Msx* transcription factors displayed a similar set of activities in a stage-dependent fashion. Overexpression of *Msx1* in HH10–12, but not HH14–16 embryos, induced the expression of roof-plate markers, caused ectopic apoptosis and repressed neuronal differentiation. On the contrary, dorsal interneurons were induced by both early and late overexpression of *Msx3*. Although the functions of Bmp signaling in the development of dorsal midline have been established by both loss-of-function and gain-of-function studies (Hebert et al., 2002; Liem et al., 1995; Panchision et al., 2001), a role for *Msx1* in dorsal midline development has only recently been demonstrated in mice (Bach et al., 2003). *Msx1*<sup>-/-</sup> mutant embryos lack a functional dorsal midline in prosomere 1 of the developing diencephalon. Roof-plate defects were not detected in the hindbrain and spinal cord of *Msx1*<sup>-/-</sup> mutant or *Msx1*<sup>-/-</sup>/*Msx2*<sup>-/-</sup> compound mutant embryos, possibly owing to compensatory activity from *Msx3* (Bach et al., 2003). However, in our chick electroporation assay, *Msx3* displayed minimal activity in inducing the roof-plate markers. Because the competence of dorsal progenitor cells to respond to signals changes rapidly from stage to stage, it is possible that *Msx3* expressed at a different stage could induce midline gene expression, and, thus, compensate for the absence of *Msx1* and

*Msx2*. How molecular mechanisms control the temporal switch of neural progenitor cells to respond to activating Bmp signaling pathway, and to activating *Msx* transcription factors, remains an important question in dorsal neural tube development.

The role of *Msx* factors as downstream effectors of Bmp signaling is supported by experiments in multiple systems. The activation of the Bmp signaling pathway is sufficient to induce the expression of *Msx* genes at different sites (reviewed by Davidson, 1995), and genetic ablation of the roof plate in mouse resulted in the loss of expression of *Msx1* and *Msx3* (Lee et al., 2000) (K. Lee, personal communication). The *Xenopus Msx1* gene acts downstream of Bmp signaling in epidermal induction and inhibition of neural differentiation in early *Xenopus* embryos (Suzuki et al., 1997). Our data support a model in which *Msx* factors mediate the stage-dependent activities of Bmp signaling in patterning the dorsal neural tube. However, in some instances, overexpression of *Msx* genes does not fully recapitulate the activities of Bmps. Thus, although *Msx* transcription factors appear to mediate multiple aspects of Bmp signaling, there are likely other parallel pathways required to account for the whole program induced by Bmp signaling.

#### Distinct functions of *Msx* genes

The biochemical properties of two *Msx* family members, *Msx1* and *Msx2*, have been compared (Catron et al., 1996). These two proteins bind a common consensus DNA site and exhibit similar DNA-binding site preferences. Both factors function as

transcriptional repressors independent of DNA-binding in transfection assays. There are subtle functional differences between the two transcription factors, including a higher DNA-binding affinity of *Msx2* and a greater potency of repression by *Msx1*. *Msx3* has also been shown to be a transcriptional repressor in transfected cells (Mehra-Chaudhary et al., 2001). It has not been previously shown whether different *Msx* factors have similar or distinct biological functions in any given developmental system *in vivo*.

Our analysis of the functions of *Msx1* and *Msx3* in neural tube development allowed us to uncover the distinct functions of these two genes. We found three activities of *Msx1* that are not shared by *Msx3*. First, early overexpression of *Msx1* but not *Msx3* promotes roof-plate cell fate. This is consistent with the observation that in E10.5 or older mouse embryos the expression of *Msx1* in the neural tube is restricted to the roof plate, whereas that of *Msx3* is in the dorsal ventricular zone but devoid from the roof plate (Wang et al., 1996). Second, *Msx1* represses neuronal differentiation along the entire dorsoventral axis of the neural tube, whereas *Msx3* induces the differentiation of dorsal interneurons at the expense of ventral neurons. Inhibition of terminal differentiation by *Msx1* has been observed in multiple developmental systems and two mechanisms have been proposed to account for this activity. Forced expression of *Msx1* efficiently blocks terminal differentiation of multiple mesenchymal and epithelial progenitor cell types in culture and differentiation of the mammary epithelium in transgenic mice, and this activity is associated with the upregulation of cyclin D1 expression and an increase of Cdk4 activity (Hu et al., 2001). *Msx1* has also been shown to inhibit muscle differentiation by repressing the expression of myogenic bHLH gene *MyoD* (Bendall et al., 1999). We observed a similar repression of early differentiation genes by *Msx1* in nervous system development including expression of chick neural bHLH genes *Cath1*, *Cash1*, *Ngn1* and *Ngn2*, and the paired-homeobox gene *Pax7*. Taken together, the data in the different systems suggest that *Msx1* blocks terminal differentiation by repressing the expression of differentiation genes and by modulating cell cycle exit.

The third activity specific to *Msx1* and not shared by *Msx3* is that *Msx1* induces apoptosis in developing neural tube. For proliferating cells, death represents an alternative pathway to differentiation. Therefore, the increased apoptosis could result from the inability of the progenitor cells overexpressing *Msx1* to properly leave the cell cycle and undergo differentiation. It is interesting that increased apoptosis, decreased proliferation and repression of neuronal differentiation have all been described as properties of the dorsal midline of the developing telencephalon (Furuta et al., 1997; Hebert et al., 2002; Monuki et al., 2001). Therefore, it is possible that these activities we observed when *ca-Bmpr1* or *Msx1* were electroporated into early neural tubes may be connected to their ability to promote roof-plate development.

In contrast to the activities of *Msx1* detailed above, the primary activity of *Msx3* in these assays seems to be the specification of dorsal interneurons. In mouse, *Msx3* is expressed specifically in the dorsal region of the neural tube in early embryos prior to the onset of dorsal neuronal differentiation (Wang et al., 1996). We show that overexpression of *Msx3* in the developing neural tube induces *Cath1*-expressing progenitor cells and the ventral expansion of

dI1 and dI3 neurons. This activity is distinct from that of *Msx1* as induction of dorsal neuron differentiation was never observed in *Msx1*-electroporated embryos.

It is important to note that in these studies we are overexpressing mouse *Msx1* and *Msx3* in chick neural tubes. Although two chick *Msx* genes have been cloned (*Msx1/GHox7* and *Msx2/GHox8*), which show high sequence homology and similar tissue distribution to the murine *Msx1* and *Msx2* genes (Coelho et al., 1991; Yokouchi et al., 1991), the chick *Msx3* gene has not been identified. Blast searches of two chick EST databases (<http://www.chichest.udel.edu/> and <http://chick.umist.ac.uk/>) using the mouse *Msx3* sequence failed to reveal a *Msx3* ortholog. As the complete sequence of the chick genome is not available, it is not yet clear if a chick *Msx3* gene exists. In the chick electroporation assay, both chick *Msx1* and *Msx2* behaved like the mouse *Msx1*, causing a reduction in the size of the neural tube and repressing neuronal differentiation (Y.L. and J.E.J., unpublished). It is possible that the differences seen in the activities of *Msx1* and *Msx3* in the chick neural tube are due to evolutionary differences in the factors that they interact with in chick, and thus, caution should be taken in assigning specific functions for the mouse genes. Assignment of specific functions will require additional loss-of-function analysis. Nevertheless, previous work in both mouse and chick suggest that *Msx3* and *Msx1/2* may have opposing functions. Whereas *Msx2* acts to mediate an apoptotic response induced by Bmp signaling in rhombomeres 3 and 5 of the hindbrain (Graham et al., 1994), the expression of *Msx3* in these rhombomeres is selectively repressed (Shimeld et al., 1996). Furthermore, targeted disruption of *Smad4*, a downstream mediator of TGF $\beta$  signaling pathway, results in a reduction of *Msx2* expression and an activation of *Msx3* expression in fibroblasts and differentiating ES cells (Sirard et al., 2000). The difference in activities revealed in chick neural tube in our study demonstrates that *Msx1* and *Msx3* have distinct activities and likely interact with different co-factors.

### Transcriptional regulation of neural differentiation genes by *Msx*

Two lines of evidence suggest that the neural bHLH genes that are crucial for neuronal differentiation might be direct transcriptional targets of *Msx1*. First, in our pursuit of factors that regulate the expression of the neural bHLH genes by yeast one-hybrid screening, *Msx1* was identified to be potential regulator for both *Math1* and *Mash1* and several consensus sites for *Msx1* binding are present in the enhancer regions of *Math1/Cath1* and *Mash1/Cash1* (S. Verma-Kurvari, P. J. Ebert, and J.E.J., unpublished). Furthermore, both *Msx1* and *Msx3* can bind to these consensus sites *in vitro* (Y.L. and J.E.J., unpublished). However, because *in vivo* *Msx1* represses the bHLH factor expression and *Msx3* induces *Cath1* expression, additional *in vivo* co-factors or chromatin properties that modulate these activities must be invoked.

The analysis of the mutants *Msx1a* and *Msx3a* underscores the importance of the homeodomains of *Msx* proteins for the activities seen in the overexpression assays. Both mutants have three amino acids in the N-terminal arm of the homeodomain replaced by arginine. *Msx1a* has previously been shown to be unable to bind DNA (Zhang et al., 1996; Zhang et al., 1997). Unfortunately, the N-terminal arm is not only responsible for

DNA-binding, it is also a major contact point for protein-protein interactions between Msx1 and basal transcription factors such as TBP or other homeodomain proteins such as Dlx (Zhang et al., 1996; Zhang et al., 1997). Therefore, these data alone are not sufficient to distinguish whether the regulation of neural differentiation genes by Msx1 depends upon its ability to bind DNA. However, Msx1a was not inert when electroporated into the neural tube but rather appeared to function as a dominant negative, suggesting that the mutant protein could form a non-functional complex with co-factor(s) important for Msx1 activity. The fact that Msx1a and Msx3a did not show similar dominant-negative activity (Table 1) implies that these two related factors use different mechanisms for activity, and suggest that they do not share protein interaction surfaces. Consistent with this notion, sequences outside the homeodomains in Msx1 and Msx3 are not related.

### Concluding statements

The data presented here clearly demonstrate distinct activities for the related transcription factors Msx1 and Msx3. The activities shown for Msx1 and Msx3 are not necessarily indicative of their *in vivo* functions under normal expression conditions, as this would require additional loss-of-function experiments. However, in the dorsal neural tube, Msx genes are likely to be effectors of the Bmp pathway because they are induced upon activation of the pathway, and we show that the two Msx factors tested can mimic multiple distinct phenotypes seen with Bmp signaling activation. It is important to note that the activities of the Msx factors alone do not account for all the phenotypes seen with activation of the Bmp pathway. Important directions for the future will be to determine other effectors of this signaling pathway, how they interact with the Msx factors and the mechanisms controlling the temporal competence of the developing neural tube to respond to these signals.

We thank the following colleagues for sharing reagents: J. Timmer for the *ca-Bmpr1* expression constructs; M. Bronner-Fraser for chick *Wnt1* *in situ* probe; D. Anderson for chick *Ngn1* and *Ngn2*; T. Reh for *Cash1*; A. Frankfurter for Tuj1 antibody; T. Jessell for Lhx2/9 antibody; G. Panganiban for Dlx antibody, and the Developmental Studies Hybridoma Bank for multiple antibodies. We are grateful to J. Timmer and M. Bronner-Fraser for helpful discussions and critical reading of the manuscript, and to S. Glasgow for performing some of the electroporations. This work was supported by a R01 grant from the NIH (NS32817).

### References

- Bach, A., Lallemand, Y., Nicola, M. A., Ramos, C., Mathis, L., Maufra, M. and Robert, B. (2003). Msx1 is required for dorsal diencephalon patterning. *Development* **130**, 4025-4036.
- Barlow, A. J. and Francis-West, P. H. (1997). Ectopic application of recombinant BMP-2 and BMP-4 can change patterning of developing chick facial primordia. *Development* **124**, 391-398.
- Barth, K. A., Kishimoto, Y., Rohr, K. B., Seydler, C., Schulte-Merker, S. and Wilson, S. W. (1999). Bmp activity establishes a gradient of positional information throughout the entire neural plate. *Development* **126**, 4977-4987.
- Bei, M. and Maas, R. (1998). FGFs and BMP4 induce both Msx1-independent and Msx1-dependent signaling pathways in early tooth development. *Development* **125**, 4325-4333.
- Bendall, A. J., Ding, J., Hu, G., Shen, M. M. and Abate-Shen, C. (1999). Msx1 antagonizes the myogenic activity of Pax3 in migrating limb muscle precursors. *Development* **126**, 4965-4976.
- Birren, S. J., Lo, L. and Anderson, D. J. (1993). Sympathetic neuroblasts undergo a developmental switch in trophic dependence. *Development* **119**, 597-610.
- Briscoe, J. and Ericson, J. (2001). Specification of neuronal fates in the ventral neural tube. *Curr. Opin. Neurobiol.* **11**, 43-49.
- Catron, K. M., Zhang, H., Marshall, S. C., Inostroza, J. A., Wilson, J. M. and Abate, C. (1995). Transcriptional repression by Msx-1 does not require homeodomain DNA-binding sites. *Mol. Cell Biol.* **15**, 861-871.
- Catron, K. M., Wang, H., Hu, G., Shen, M. M. and Abate-Shen, C. (1996). Comparison of MSX-1 and MSX-2 suggests a molecular basis for functional redundancy. *Mech. Dev.* **55**, 185-199.
- Chen, Y., Bei, M., Woo, I., Satokata, I. and Maas, R. (1996). Msx1 controls inductive signaling in mammalian tooth morphogenesis. *Development* **122**, 3035-3044.
- Coelho, C. N., Sumoy, L., Rodgers, B. J., Davidson, D. R., Hill, R. E., Upholt, W. B. and Kosher, R. A. (1991). Expression of the chicken homeobox-containing gene GHox-8 during embryonic chick limb development. *Mech. Dev.* **34**, 143-154.
- Cornell, R. A. and Ohlen, T. V. (2000). Vnd/nkx, ind/gsh, and msh/msx: conserved regulators of dorsoventral neural patterning? *Curr. Opin. Neurobiol.* **10**, 63-71.
- Davidson, D. (1995). The function and evolution of Msx genes: pointers and paradoxes. *Trends Genet.* **11**, 405-411.
- Ericson, J., Thor, S., Edlund, T., Jessell, T. M. and Yamada, T. (1992). Early stages of motor neuron differentiation revealed by expression of homeobox gene *Islet-1*. *Science* **256**, 1555-1560.
- Ericson, J., Morton, S., Kawakami, A., Roelink, H. and Jessell, T. M. (1996). Two critical periods of Sonic Hedgehog signaling required for the specification of motor neuron identity. *Cell* **87**, 661-673.
- Furuta, Y., Piston, D. W. and Hogan, B. L. (1997). Bone morphogenetic proteins (BMPs) as regulators of dorsal forebrain development. *Development* **124**, 2203-2212.
- Ganan, Y., Macias, D., Duterque-Coquillaud, M., Ros, M. A. and Hurle, J. M. (1996). Role of TGF beta s and BMPs as signals controlling the position of the digits and the areas of interdigital cell death in the developing chick limb autopod. *Development* **122**, 2349-2357.
- Garcia-Castro, M. I., Marcelle, C. and Bronner-Fraser, M. (2002). Ectodermal Wnt function as a neural crest inducer. *Science* **297**, 848-851.
- Gowan, K., Helms, A. W., Hunsaker, T. L., Collisson, T., Ebert, P. J., Odum, R. and Johnson, J. E. (2001). Crossinhibitory activities of *ngn1* and *math1* allow specification of distinct dorsal interneurons. *Neuron* **31**, 219-232.
- Graham, A., Francis-West, P., Brickell, P. and Lumsden, A. (1994). The signalling molecule BMP4 mediates apoptosis in the rhombencephalic neural crest. *Nature* **372**, 684-686.
- Gross, M. K., Dottori, M. and Goulding, M. (2002). Lbx1 specifies somatosensory association interneurons in the dorsal spinal cord. *Neuron* **34**, 535-549.
- Hamburger, V. and Hamilton, H. L. (1992). A series of normal stages in the development of the chick embryo. 1951. *Dev. Dyn.* **195**, 231-272.
- Hebert, J. M., Mishina, Y. and McConnell, S. K. (2002). BMP signaling is required locally to pattern the dorsal telencephalic midline. *Neuron* **35**, 1029-1041.
- Helms, A. W. and Johnson, J. E. (1998). Progenitors of dorsal commissural interneurons are defined by MATH1 expression. *Development* **125**, 919-928.
- Helms, A. W. and Johnson, J. E. (2003). Specification of dorsal spinal cord interneurons. *Curr. Opin. Neurobiol.* **13**, 42-49.
- Hill, R. E., Jones, P. F., Rees, A. R., Sime, C. M., Justice, M. J., Copeland, N. G., Jenkins, N. A., Graham, E. and Davidson, D. R. (1989). A new family of mouse homeo box-containing genes: molecular structure, chromosomal location, and developmental expression of Hox-7.1. *Genes Dev.* **3**, 26-37.
- Hu, G., Lee, H., Price, S., Shen, M. and Abate-Shen, C. (2001). Msx homeobox genes inhibit differentiation through upregulation of cyclin D1. *Development* **128**, 2373-2384.
- Le Douarin, N. M. (1982). *The Neural Crest*, Vol. 12. Cambridge, UK: Cambridge University Press.
- Lee, K. J. and Jessell, T. M. (1999). The specification of dorsal cell fates in the vertebrate central nervous system. *Annu. Rev. Neurosci.* **22**, 261-294.
- Lee, K. J., Mendelsohn, M. and Jessell, T. M. (1998). Neuronal patterning by BMPs: a requirement for GDF7 in the generation of a discrete class of commissural interneurons in the mouse spinal cord. *Genes Dev.* **12**, 3394-3407.
- Lee, K. J., Dietrich, P. and Jessell, T. M. (2000). Genetic ablation reveals

- that the roof plate is essential for dorsal interneuron specification. *Nature* **403**, 734-740.
- Lee, M. K., Tuttle, J. B., Rebhun, L. I., Cleveland, D. W. and Frankfurter, A.** (1990). The expression and posttranslational modification of a neuron-specific beta-tubulin isotype during chick embryogenesis. *Cell Motil. Cytoskel.* **17**, 118-132.
- Liem, K. F., Jr, Tremml, G., Roelink, H. and Jessell, T. M.** (1995). Dorsal differentiation of neural plate cells induced by BMP-mediated signals from epidermal ectoderm. *Cell* **82**, 969-979.
- Liem, K. F., Jr, Tremml, G. and Jessell, T. M.** (1997). A role for the roof plate and its resident TGFbeta-related proteins in neuronal patterning in the dorsal spinal cord. *Cell* **91**, 127-138.
- Mansouri, A. and Gruss, P.** (1998). Pax3 and Pax7 are expressed in commissural neurons and restrict ventral neuronal identity in the spinal cord. *Mech. Dev.* **78**, 171-178.
- Mehra-Chaudhary, R., Matsui, H. and Raghov, R.** (2001). Msx3 protein recruits histone deacetylase to down-regulate the Msx1 promoter. *Biochem. J.* **353**, 13-22.
- Millonig, J. H., Millen, K. J. and Hatten, M. E.** (2000). The mouse Dreher gene *Lmx1a* controls formation of the roof plate in the vertebrate CNS. *Nature* **403**, 764-769.
- Monuki, E. S., Porter, F. D. and Walsh, C. A.** (2001). Patterning of the dorsal telencephalon and cerebral cortex by a roof plate-Lhx2 pathway. *Neuron* **32**, 591-604.
- Muller, T., Brohmann, H., Pierani, A., Heppenstall, P. A., Lewin, G. R., Jessell, T. M. and Birchmeier, C.** (2002). The homeodomain factor *lhx1* distinguishes two major programs of neuronal differentiation in the dorsal spinal cord. *Neuron* **34**, 551-562.
- Muramatsu, T., Mizutani, Y., Ohmori, Y. and Okumura, J.** (1997). Comparison of three nonviral transfection methods for foreign gene expression in early chicken embryos in ovo. *Biochem. Biophys. Res. Commun.* **230**, 376-380.
- Newberry, E. P., Latifi, T., Battaile, J. T. and Towler, D. A.** (1997). Structure-function analysis of *Msx2*-mediated transcriptional suppression. *Biochemistry* **36**, 10451-10462.
- Nguyen, V. H., Trout, J., Connors, S. A., Andermann, P., Weinberg, E. and Mullins, M. C.** (2000). Dorsal and intermediate neuronal cell types of the spinal cord are established by a BMP signaling pathway. *Development* **127**, 1209-1220.
- Panchision, D. M., Pickel, J. M., Studer, L., Lee, S. H., Turner, P. A., Hazel, T. G. and McKay, R. D.** (2001). Sequential actions of BMP receptors control neural precursor cell production and fate. *Genes Dev.* **15**, 2094-2110.
- Panganiban, G., Sebring, A., Nagy, L. and Carroll, S.** (1995). The development of crustacean limbs and the evolution of arthropods. *Science* **270**, 1363-1366.
- Parr, B. A., Shea, M. J., Vassileva, G. and McMahon, A. P.** (1993). Mouse Wnt genes exhibit discrete domains of expression in the early embryonic CNS and limb buds. *Development* **119**, 247-261.
- Pierani, A., Moran-Rivard, L., Sunshine, M. J., Littman, D. R., Goulding, M. and Jessell, T. M.** (2001). Control of interneuron fate in the developing spinal cord by the progenitor homeodomain protein *Dbx1*. *Neuron* **29**, 367-384.
- Riddle, R. D., Ensini, M., Nelson, C., Tsuchida, T., Jessell, T. M. and Tabin, C.** (1995). Induction of the LIM homeobox gene *Lmx1* by WNT7a establishes dorsoventral pattern in the vertebrate limb. *Cell* **83**, 631-640.
- Robert, B., Sassoon, D., Jacq, B., Gehring, W. and Buckingham, M.** (1989). *Hox-7*, a mouse homeobox gene with a novel pattern of expression during embryogenesis. *EMBO J.* **8**, 91-100.
- Satokata, I., Ma, L., Ohshima, H., Bei, M., Woo, I., Nishizawa, K., Maeda, T., Takano, Y., Uchiyama, M., Heaney, S. et al.** (2000). *Msx2* deficiency in mice causes pleiotropic defects in bone growth and ectodermal organ formation. *Nat. Genet.* **24**, 391-395.
- Satokata, I. and Maas, R.** (1994). *Msx1* deficient mice exhibit cleft palate and abnormalities of craniofacial and tooth development. *Nat. Genet.* **6**, 348-356.
- Shimeld, S. M., McKay, I. J. and Sharpe, P. T.** (1996). The murine homeobox gene *Msx-3* shows highly restricted expression in the developing neural tube. *Mech. Dev.* **55**, 201-210.
- Sirard, C., Kim, S., Mirtos, C., Tadich, P., Hoodless, P. A., Itie, A., Maxson, R., Wrana, J. L. and Mak, T. W.** (2000). Targeted disruption in murine cells reveals variable requirement for Smad4 in transforming growth factor beta-related signaling. *J. Biol. Chem.* **275**, 2063-2070.
- Song, K., Wang, Y. and Sassoon, D.** (1992). Expression of *Hox-7.1* in myoblasts inhibits terminal differentiation and induces cell transformation. *Nature* **360**, 477-481.
- Suzuki, A., Ueno, N. and Hemmati-Brivanlou, A.** (1997). *Xenopus msx1* mediates epidermal induction and neural inhibition by BMP4. *Development* **124**, 3037-3044.
- Tanabe, Y., William, C. and Jessell, T. M.** (1998). Specification of motor neuron identity by the MNR2 homeodomain protein. *Cell* **95**, 67-80.
- Timmer, J., Wang, C. and Niswander, L.** (2002). BMP signaling patterns the dorsal and intermediate neural tube via regulation of homeobox and helix-loop-helix transcription factors. *Development* **129**, 2459-2472.
- Tsuchida, T., Ensini, M., Morton, S. B., Baldassare, M., Edlund, T., Jessell, T. M. and Pfaff, S. L.** (1994). Topographic organization of embryonic motor neurons defined by expression of LIM homeobox genes. *Cell* **79**, 957-970.
- Vainio, S., Karavanova, I., Jowett, A. and Thesleff, I.** (1993). Identification of BMP-4 as a signal mediating secondary induction between epithelial and mesenchymal tissues during early tooth development. *Cell* **75**, 45-58.
- Wang, W., Chen, X., Xu, H. and Lufkin, T.** (1996). *Msx3*: a novel murine homologue of the *Drosophila msh* homeobox gene restricted to the dorsal embryonic central nervous system. *Mech. Dev.* **58**, 203-215.
- Woloshin, P., Song, K., Degnin, C., Killary, A. M., Goldhamer, D. J., Sassoon, D. and Thayer, M. J.** (1995). *MSX1* inhibits *myoD* expression in fibroblast x 10T1/2 cell hybrids. *Cell* **82**, 611-620.
- Yokouchi, Y., Ohsugi, K., Sasaki, H. and Kuroiwa, A.** (1991). Chicken homeobox gene *Msx-1*: structure, expression in limb buds and effect of retinoic acid. *Development* **113**, 431-444.
- Yuan, S. and Schoenwolf, G. C.** (1999). The spatial and temporal pattern of C-*Lmx1* expression in the neuroectoderm during chick neurulation. *Mech. Dev.* **88**, 243-247.
- Zhang, H., Catron, K. M. and Abate-Shen, C.** (1996). A role for the *Msx-1* homeodomain in transcriptional regulation: residues in the N-terminal arm mediate TATA binding protein interaction and transcriptional repression. *Proc. Natl. Acad. Sci. USA* **93**, 1764-1769.
- Zhang, H., Hu, G., Wang, H., Scivolino, P., Iler, N., Shen, M. M. and Abate-Shen, C.** (1997). Heterodimerization of *Msx* and *Dlx* homeoproteins results in functional antagonism. *Mol. Cell Biol.* **17**, 2920-2932.
